# Supplementary material
Source: publisher figshare collection journal article supplement (https://sage.figshare.com/ndownloader/files/22090098)
Supplement: Supplementary file 1 [file 22090098]

**Supplemental Table 1.** Signalment, clinical information and necropsy findings of 20 cases of equine intestinal lymphoma.<sup>a</sup>

|       | Case | Gender | Age | Breed    | Presenting complaint                        | Intestinal<br>localization at<br>clinical<br>presentation | Surgical<br>findings                                                 | Treatment (*)                | Outcome | Reason for<br>death/euthanasia             | Days<br>survival | Necropsy/gross<br>findings                                                   |
|-------|------|--------|-----|----------|---------------------------------------------|-----------------------------------------------------------|----------------------------------------------------------------------|------------------------------|---------|--------------------------------------------|------------------|------------------------------------------------------------------------------|
| EATL1 | 1    | M      | 12  | TB       | Chronic diarrhoea,<br>weight loss, anorexia | Large intestinal                                          | N/A                                                                  | N/A                          | E (LR)  | Lack of response to<br>treatment           | 20               | Diffuse SI thickening,<br>multifocal<br>erosion/ulceration                   |
|       | 2    | M      | 8   | TB       | Acute colic of moderate<br>severity         | Large intestinal                                          | N/A                                                                  | N/A                          | E (LR)  | Laminitis secondary<br>to colitis          | 14               | LI nodules and mural<br>thickening                                           |
|       | 3    | M      | 6   | QH       | Chronic weight loss                         | Small intestinal                                          | N/A                                                                  | Corticosteroids              | E (LR)  | Deterioration of<br>clinical signs         | 25               | LI diffuse thickening and<br>reddening and multifocal<br>nodules and plaques |
|       | 4    | F      | 30  | Galloway | Acute colic                                 | Small intestinal                                          | Partial<br>obstruction<br>mid jejunum<br>due to mural<br>thickening  | Resection and<br>anastomosis | E (LR)  | Recurrence of colic<br>following discharge | 60               | SI thickening (jejunum)                                                      |
|       | 5    | F      | 20  | TB       | Weight loss, chronic<br>colic               | Small intestinal                                          | Multiple<br>diverticulae of<br>jejunum and<br>partial<br>obstruction | Resection and<br>anastomosis | E (LR)  | Recurrence of colic<br>following discharge | 90               | SI diverticulae<br>(recurrence),<br>lumphadenomegaly                         |

*Veterinary Pathology: Supplemental Materials*  
Bacci et al. Equine intestinal lymphoma: clinical-pathological features, immunophenotype, and survival.

|       |    |   |     |      |                                                                          |                  |                                                           |                    |         |                                          |     |                                                         |
|-------|----|---|-----|------|--------------------------------------------------------------------------|------------------|-----------------------------------------------------------|--------------------|---------|------------------------------------------|-----|---------------------------------------------------------|
| EATL2 | 6  | M | 16  | TB   | Acute colic                                                              | Small intestinal | Fluid distension of the small intestine                   | Corticosteroids    | E (LR)  | Recurrence of colic, persistent reflux   | 8   | SI thickening, serosal adhesions                        |
|       | 7  | M | 20  | Pony | Chronic weight loss, hypoalbuminaemia, immune compromise                 | Non specific     | N/A                                                       | N/A                | E (LR)  | Suspicion of neoplasia                   | N/A | SI mucosal reddening and oedema, caecum and small colon |
|       | 8  | M | 12  | TB   | Chronic diarrhea, weight loss, anorexia, recurrent colic                 | Large intestinal | N/A                                                       | N/A                | E (LR)  | Deterioration of clinical signs          | 120 | LI thickening                                           |
|       | 9  | M | 15  | Pony | Acute colic                                                              | Large intestinal | Caecocaecal intussusception                               | Partial typhlotomy | E (NLR) | Fracture during recovery from anesthesia | 0   | LI thickening and reddening                             |
|       | 10 | M | 11  | WB   | Colic, persistent low volume reflux, fever                               | Small intestinal | Thickened small intestine                                 | Corticosteroids    | A       | N/A                                      | 650 | N/A                                                     |
|       | 11 | F | 6   | QH   | Chronic diarrhea (3 months prior to presentation), weight loss, anorexia | Large intestinal | N/A                                                       | N/A                | E (LR)  | Deterioration in clinical signs          | 90  | N/A                                                     |
|       | 12 | F | N/A | TB   | Low grade colic progressing to marked pain                               | Small intestinal | Thickening of small intestine, enlargement of lymph nodes | Corticosteroids    | A       | N/A                                      | 360 | N/A                                                     |

*Veterinary Pathology: Supplemental Materials*  
Bacci et al. Equine intestinal lymphoma: clinical-pathological features, immunophenotype, and survival.

|    |   |    |                   |                                                            |                  |                                                                                                 |                              |         |                                                                   |    |                                                               |
|----|---|----|-------------------|------------------------------------------------------------|------------------|-------------------------------------------------------------------------------------------------|------------------------------|---------|-------------------------------------------------------------------|----|---------------------------------------------------------------|
| 13 | M | 6  | QH                | Acute colic                                                | Small intestinal | focal<br>thickening of<br>small intestine<br>causing<br>obstruction                             | Resection and<br>anastomosis | E (LR)  | Diagnosis of<br>neoplasia and post-<br>operative<br>complications | 2  | Diffuse SI thickening<br>and multifocal<br>erosion/ulceration |
| 14 | F | 5  | TB                | Weight loss of 8 week<br>duration                          | Small intestinal | Jejunum<br>entrapped in<br>nephrosplenic<br>space,<br>multifocal<br>small intestinal<br>plaques | N/A                          | E (NLR) | Diagnosis of<br>neoplasia                                         | 12 | SI nodules and plaques,<br>mucosal ulceration                 |
| 15 | M | 6  | TB                | Acute colic<br>unresponsive to<br>analgesia                | Small colon      | Small colon<br>impaction                                                                        | N/A                          | E (LR)  | Based on<br>histological<br>diagnosis during<br>relaparotomy      | 0  | Impaction (recurrence),<br>reddening of SI and LI             |
| 16 | F | 1  | Miniature<br>pony | Colic, extreme<br>tachycardia, suspected<br>acute toxicity | Small intestinal | Serosal<br>inflammation,<br>small intestinal<br>distension                                      | N/A                          | D (NLR) | Progressive<br>cardiovascular<br>collapse                         | 5  | Multiple nodules in SI<br>and LI                              |
| 17 | F | 18 | Arab              | Colic, lethargy, fever,<br>weight loss                     | Small intestinal | Multifocal<br>serosal<br>nodules and<br>small intestinal<br>distension                          | N/A                          | E (LR)  | Suspicion of<br>neoplasia                                         | 0  | SI multiple nodules                                           |

*Veterinary Pathology: Supplemental Materials*

Bacci et al. Equine intestinal lymphoma: clinical-pathological features, immunophenotype, and survival.

|         |    |   |    |      |                                             |                  |                                                                 |                                     |        |                                                          |     |                                            |
|---------|----|---|----|------|---------------------------------------------|------------------|-----------------------------------------------------------------|-------------------------------------|--------|----------------------------------------------------------|-----|--------------------------------------------|
| TCRLBCL | 18 | M | 13 | WB   | Colic non responsive to medical management  | Large intestinal | Large colon displacement, mass on right dorsal colon            | Surgical resection, corticosteroids | A      | N/A                                                      | 360 | N/A                                        |
|         | 19 | M | 27 | Arab | Chronic diarrhea, weight loss               | Large intestinal | N/A                                                             | N/A                                 | E (LR) | Unresponsive to medical management                       | 15  | LI nodules and mesenteric lymphadenomegaly |
|         | 20 | M | 22 | TB   | Colic, non-responsive to medical management | Large intestinal | transverse colon impaction and caecal impaction at relaparotomy | Corticosteroids                     | E (LR) | Based on histologic diagnosis and repeated post op colic | 2   | LI nodules and mesenteric lymphadenomegaly |

<sup>a</sup>Treatment aimed at neoplastic disease. EATL=Enteropathy-associated T cell lymphoma; TCRLBCL= T cell rich large B cell lymphoma; M=male(gelding), F=female, SI=small intestine, LI=large intestine; A=alive at the end of the study, D=died, E=euthanized; LR= lymphoma-related; NLR= non lymphoma-related; N/A=not available; TB=thoroughbred, WB= warmblood, QH= quarter horse.
